# Supplementary material for: Electrodeposition of a 3D dendritic Cu–Sn bimetallic alloy for electrocatalytic nitrate reduction to ammonia
Source: Royal Society of Chemistry journal article supplement (doi:10.1039/d4nj02343a), 2024-01-01
Supplement: d4nj02343a1.pdf [file d4nj02343a1.pdf]

## Supplementary Information

### **Electrodeposition of 3D dendritic Cu-Sn bimetallic alloy for electrocatalytic nitrate reduction to ammonia**

Jinxiu Zhao,<sup>a,b,\*</sup> Jingyi Xu,<sup>c</sup> and Liyi Shi<sup>a,\*</sup>

<sup>a</sup> *Emerging Industries Institute, Shanghai University, Jiaxing 314050, Zhejiang, China.*

<sup>b</sup> *School of Materials Science and Engineering, University of Jinan, Jinan 250022, P. R. China.*

<sup>c</sup> *Shandong Genyuan New Materials Co., LTD., Weihai, 264400, Shandong, China.*

\*Corresponding author.

E-mail address: shiliyi@shu.edu.cn (L. Shi)

mse\_zhaojx@ujn.edu.cn (J. Zhao)

## Materials

Sodium nitroprusside ( $C_5FeN_6Na_2O_2 \cdot H_2O$ ), ammonium chloride ( $NH_4Cl$ ), copper sulfate ( $CuSO_4$ ), potassium hydroxide ( $KOH$ ), sodium nitrite ( $NaNO_2$ ), sodium nitrate- $^{15}N$  ( $Na^{15}NO_3$ ), sulfamic acid ( $NH_2SO_3H$ ), N-(1-naphthyl) ethylenediamine dihydrochloride ( $C_{12}H_{14}N_2$ ), sulfonamide ( $H_4N_2O_2S$ ), phosphoric acid ( $H_3PO_4$ ) and sodium hypochlorite solution ( $NaClO$ ) were purchased from Maclean. Stannous chloride ( $SnCl_2$ ) and sodium nitrate ( $NaNO_3$ ) were purchased from Sinopharm Chemical Reagent Co., Ltd. Anhydrous sodium sulfate ( $Na_2SO_4$ ) and sodium salicylate ( $C_7H_5NaO_3$ ) were purchased from Aladdin. Anhydrous ethanol ( $C_2H_5OH$ ) and hydrazine hydrate ( $N_2H_4 \cdot H_2O$ ) were purchased from Tianjin FuYu Chemical Fine Co., Ltd. Sodium hydroxide ( $NaOH$ ) was purchased from Tianjin Damao Chemical Reagent Factory, and nitric acid ( $HNO_3$ ), sulfuric acid ( $H_2SO_4$ ) and hydrochloric acid ( $HCl$ ) were purchased from Yantai Far East Fine Chemical Co., Ltd.

## Characterization

X-ray diffraction (XRD) patterns were acquired by using D8 focus diffractometer (BLumker AXS, Germany). The morphology images were obtained from Gemini 300 field emission SEM (Zeiss, Germany) and JEM-2100 TEM (Zeiss, Germany). Elements species and distribution were obtained by an X-Max<sup>N</sup> 50 EDS (Oxford, China). XPS spectra were obtained from an Axis Supra X-ray photoelectron spectrometer (Shimadzu, Japan). The absorbance data of spectrophotometer were measured on TU-1909 spectrophotometer (Beijing Puxi Instrument Co. Ltd, China). The isotope labeling nuclear magnetic resonance (NMR) were measured on AVANCE III HD 600 MHz (Bruker, Swiss Confederation).

## Preparation of Cu-Sn alloy

The dendritic Cu-Sn alloy catalysts were synthesized by DHBT electrodeposition technique. Two-step electrodeposition was used to prepare the 3D dendritic Cu-Sn alloy catalyst. Firstly, constant current ( $0.25 \text{ A cm}^{-2}$  for 5 min) electrodeposition was used to form porous structures on the copper foil under acidic conditions (0.5 M

H<sub>2</sub>SO<sub>4</sub>, SnCl<sub>2</sub>, and CuSO<sub>4</sub>) using the hydrogen bubble template method to increase the surface area of the catalyst. The 3D dendritic copper-tin bimetallic alloy catalyst was obtained, then washed with ultrapure water and ethanol, and dried at 60 °C for 2 h. The concentration of CuSO<sub>4</sub> and SnCl<sub>2</sub> to synthesize series of Cu-Sn alloy listed in Table S2.

### **Electrochemical measurements**

Electrochemical measurements were performed with a CHI 660E electrochemical analyzer (CHI Instruments, Inc., Shanghai) in a standard three-electrode system using Cu-Sn alloy as working electrode, Ag/AgCl as reference electrode, and graphite rod as counter electrode. For NO<sub>3</sub><sup>-</sup> reduction experiments, the 0.1 M Na<sub>2</sub>SO<sub>4</sub> + 0.01 M NaNO<sub>3</sub> was bubbled with Ar for 30 min before the measurement.

The following formula was utilized to convert the potential reported in this work to RHE scale through calibration:  $E(\text{vs RHE}) = E(\text{vs Ag/AgCl}) + 0.197 + 0.059 \times \text{pH}$ , and the polarization curve was the steady-state curve after a few cycles. All electrochemical tests were conducted at 25 °C. During NO<sub>3</sub>RR tests, two chambers of the H-type electrolytic cell was separated by a Nafion membrane, so that the anode chamber can continuously provide the H<sup>+</sup> required for the reaction to the cathode chamber for NH<sub>3</sub> formation. Before NO<sub>3</sub>RR tests, the Nafion membrane was pre-treated by heating in 5% H<sub>2</sub>O<sub>2</sub> solution and ultrapure water at 80 °C for 1 h, respectively. All experiments were carried out at room temperature (25 °C).

### **Determination of NH<sub>3</sub>**

The produced ammonia was estimated by indophenol blue method by ultraviolet spectroscopy.<sup>1</sup> In detail, 400 μL electrolyte was diluted to 4 mL for further use, then 4 mL aforementioned solution was removed from the cathodic chamber and added into 50 μL oxidizing solution containing NaClO (ρ<sub>Cl</sub> = 4 – 4.9) and NaOH (0.75 M), followed by further adding 500 μL coloring solution containing 0.4 M C<sub>7</sub>H<sub>5</sub>O<sub>3</sub>Na and 0.32 M NaOH, and 50 μL catalyst solution (0.1 g Na<sub>2</sub>[Fe(CN)<sub>5</sub>NO]·H<sub>2</sub>O diluted to 10 mL with deionized water) in turn. After standing at 25 °C for 2 h, the UV-Vis absorption spectrum was measured. The concentration of indophenol blue was

determined using the absorbance at a wavelength of 655 nm. In this study, a concentration-absorbance curve was obtained using a standard ammonium chloride solution firstly. The fitted curve ( $y = 0.382x + 0.0425$ ,  $R^2=0.999$ ) indicates a good linear relationship between the absorbance value and the  $\text{NH}_3$  concentration.

#### **Calculation of $\text{NH}_3$ yield rate and FE**

The  $\text{NH}_3$  yield rate and FE were calculated using the following formula:

$$\text{NH}_3 \text{ yield rate} = (c_{\text{NH}_3} \times V) / (17 \times t \times A) \quad (1)$$

$$\text{FE} = [8 \times F \times c_{\text{NH}_3} \times V / 17 \times 10^6 \times Q] \times 100\% \quad (2)$$

Where  $c_{\text{NH}_3}$  ( $\mu\text{g mL}^{-1}$ ) is the measured  $\text{NH}_3$  concentration;  $V$  (mL) is the volume of the electrolyte;  $t$  (h) is the reduction reaction time; and  $A$  ( $\text{cm}^2$ ) is the geometric area of the cathode;  $F$  ( $96485 \text{ C mol}^{-1}$ ) is the Faraday constant; and  $Q$  (C) is the amount of electricity applied.

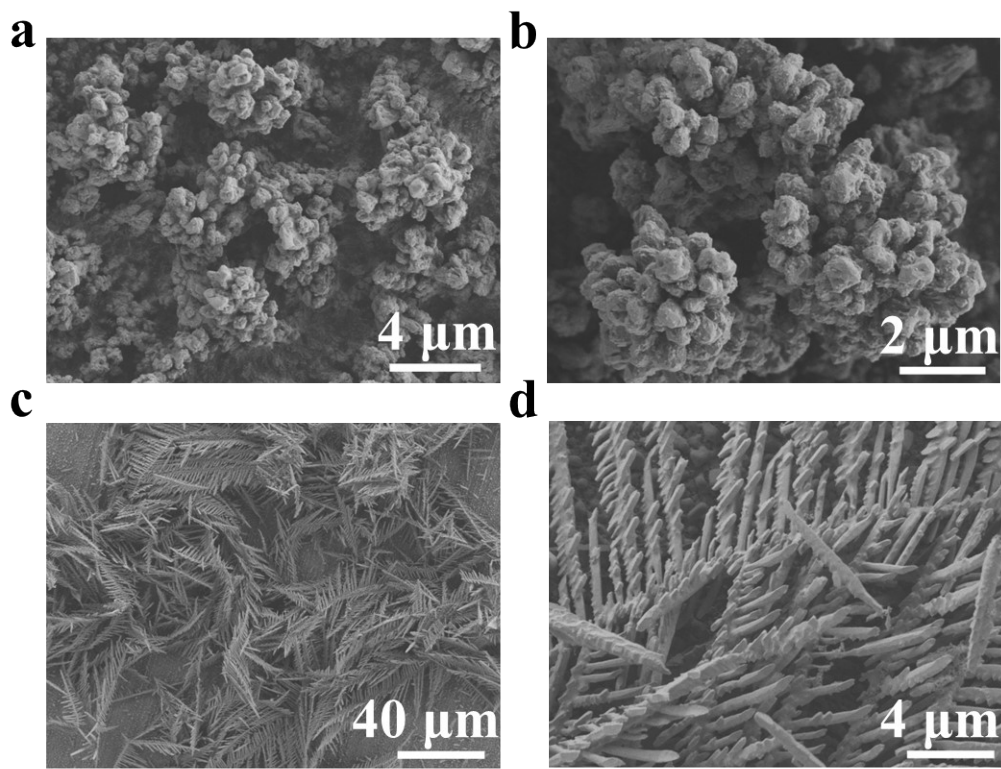

**Fig. S1.** (a) and (b) SEM images of single Cu. (c) and (d) SEM images of single Sn.

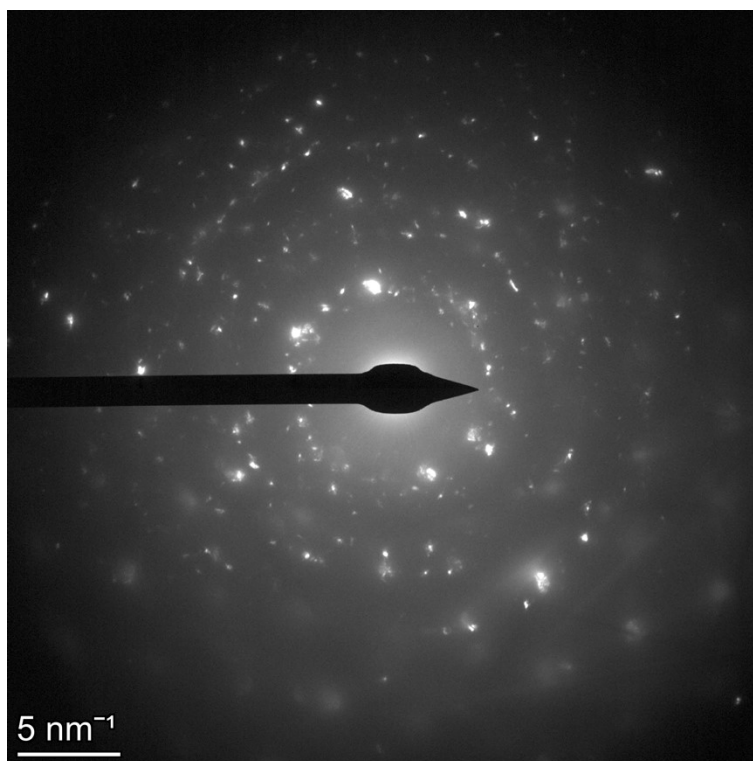

**Fig. S2.** SAED image taken from Cu-Sn alloy.

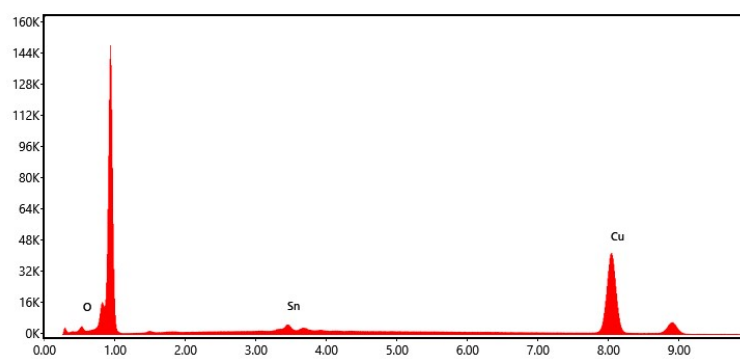

**Fig. S3.** EDX spectrum of Cu-Sn alloy.

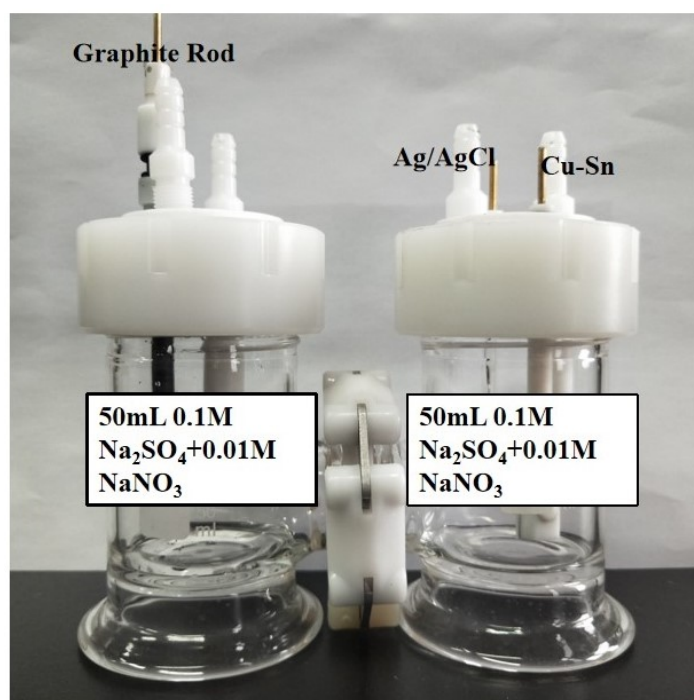

**Fig. S4.** Optical photograph of the reaction device.



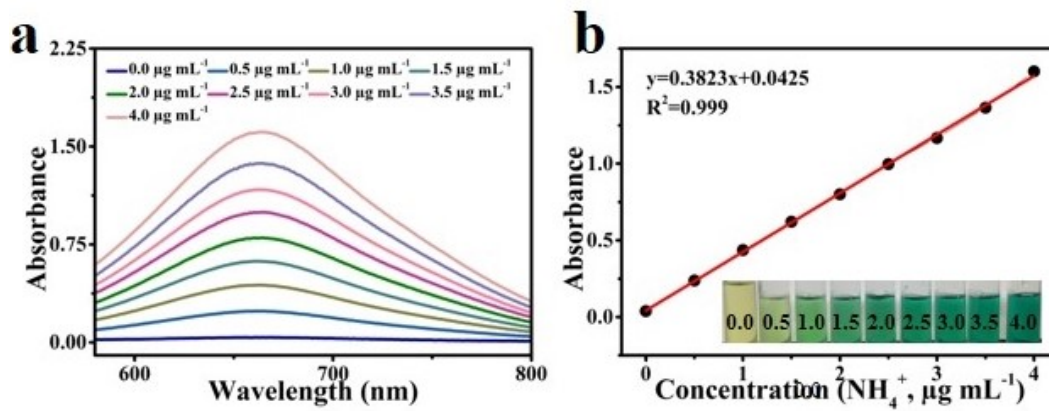

**Fig. S5.** (a) UV-Vis absorption spectra of various  $\text{NH}_3$  concentrations after 1 h of color development at room temperature. (b) Calibration curve used to calculate  $\text{NH}_4^+$  concentration.

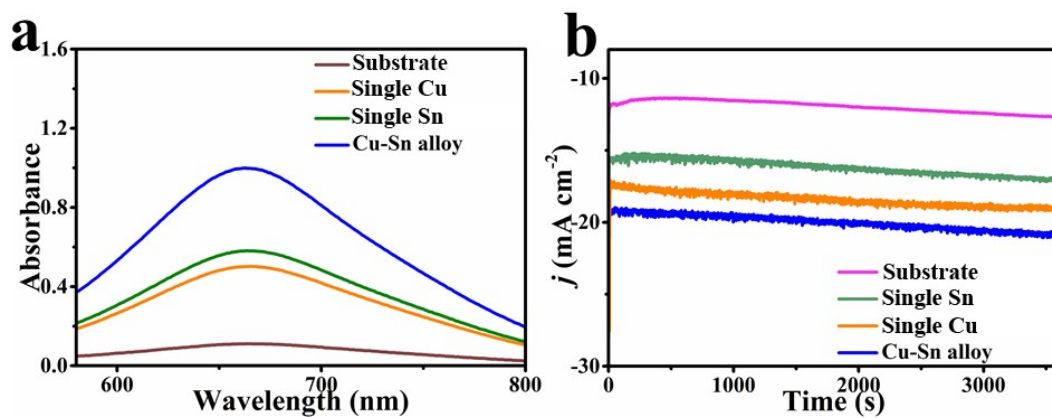

**Fig. S6.** (a) UV-Vis absorption spectrum of  $\text{NH}_3$  concentration and (b) Time-dependent current density curves of substrate, single Sn, single Cu foil, and Cu-Sn alloy for  $\text{NO}_3\text{RR}$  at  $-1.2$  V (RHE).

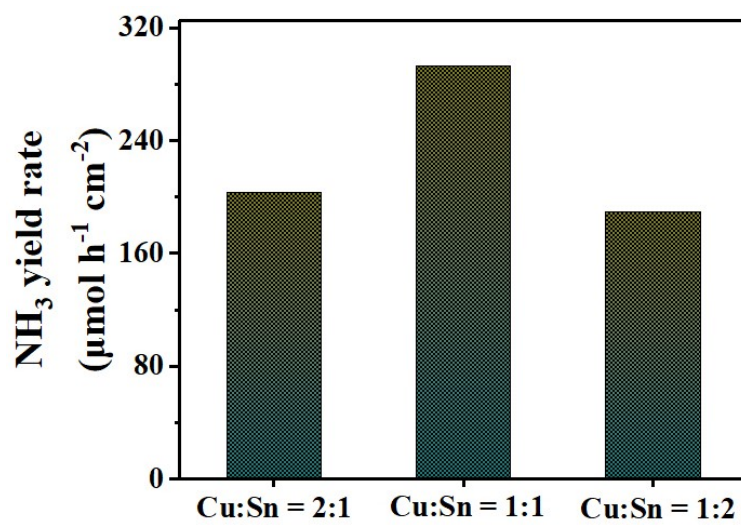

**Fig. S7.** Average NH<sub>3</sub> yield rates of Cu-Sn alloy with different ratio of Cu and Sn for NO<sub>3</sub>RR at -1.2 V vs. RHE.

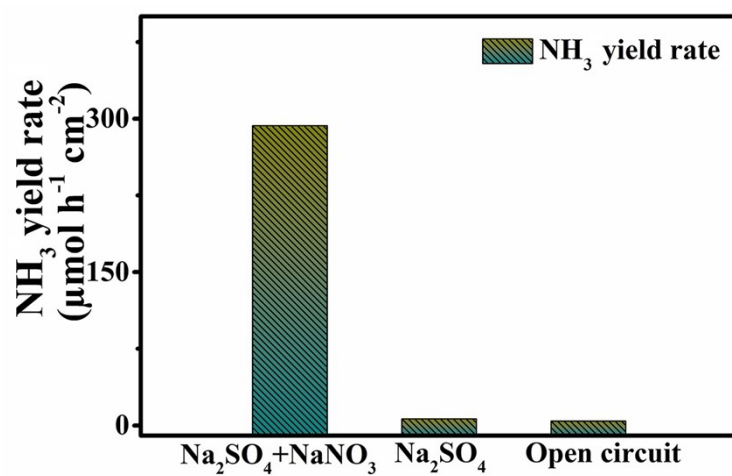

**Fig. S8.** Average NH<sub>3</sub> yield rates of Cu-Sn alloy in 0.1 M Na<sub>2</sub>SO<sub>4</sub> (containing 0.01 M NaNO<sub>3</sub>), 0.1 M Na<sub>2</sub>SO<sub>4</sub> (without NO<sub>3</sub><sup>-</sup>) and open circuit for NO<sub>3</sub>RR at -1.2 V vs. RHE.

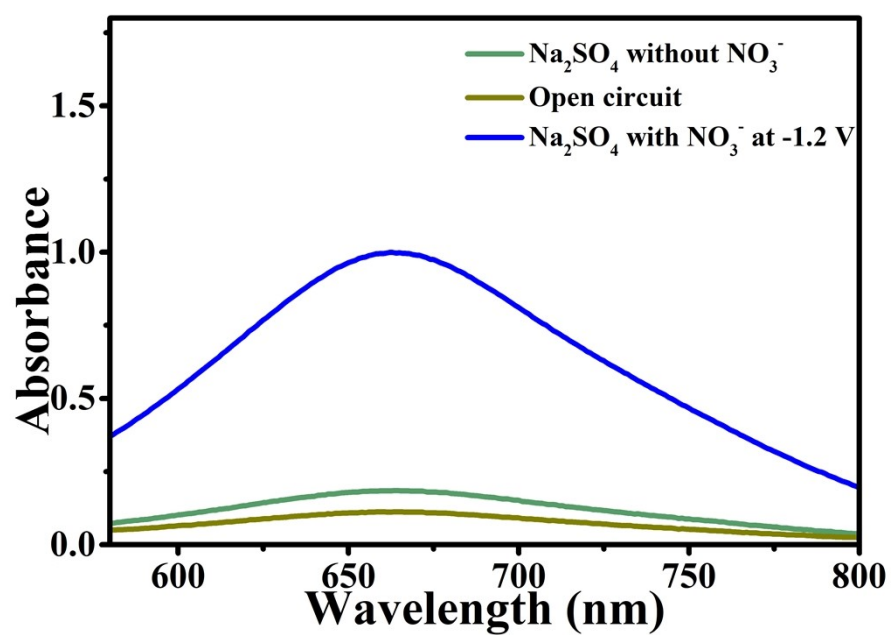

**Fig. S9.** UV–Vis absorption spectra of the 0.1 M Na<sub>2</sub>SO<sub>4</sub> solution and 0.1 M Na<sub>2</sub>SO<sub>4</sub> solution (containing 0.01 M NO<sub>3</sub><sup>-</sup>) after charging at -1.2 V vs. RHE for 1 h and at open-circuit potential under ambient conditions for 1 h after incubated with NH<sub>3</sub> color agent.

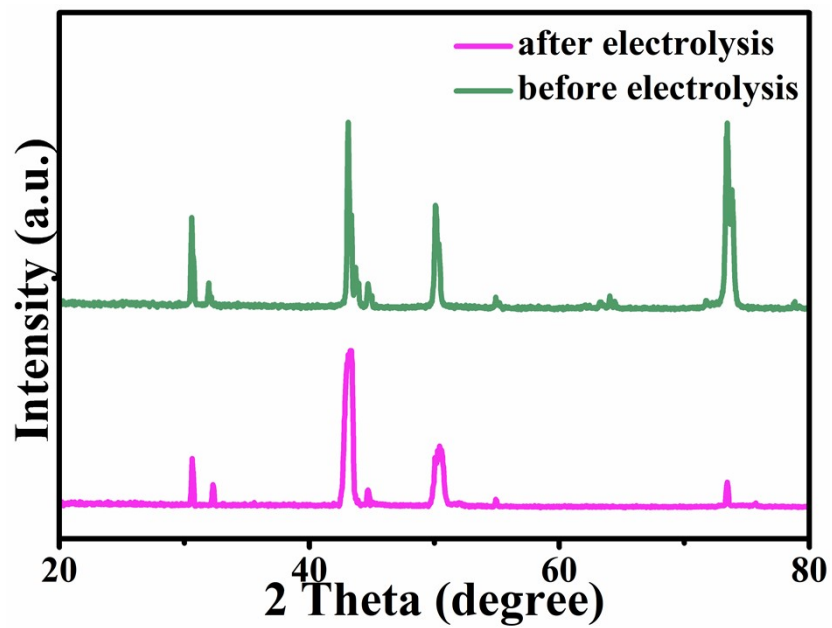

**Fig. S10.** XRD pattern for Cu-Sn alloy after stability test in 0.1 M  $\text{Na}_2\text{SO}_4$  (containing 0.01 M  $\text{NaNO}_3$ ).

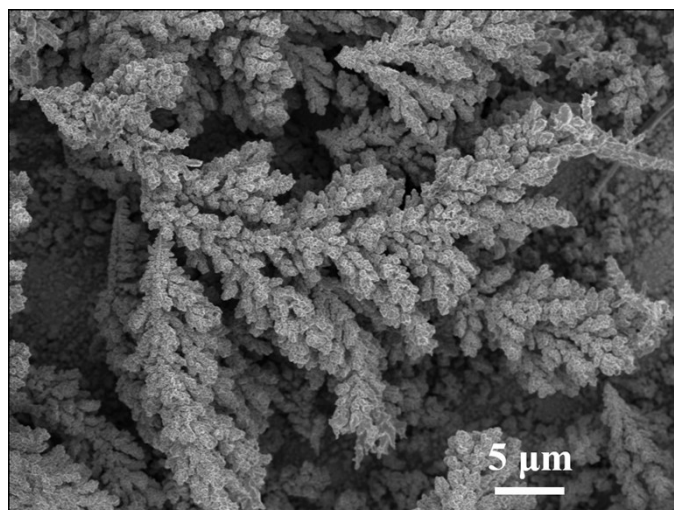

**Fig. S11.** SEM image of Cu-Sn alloy after stability test in 0.1 M  $\text{Na}_2\text{SO}_4$  (containing 0.01 M  $\text{NaNO}_3$ ).

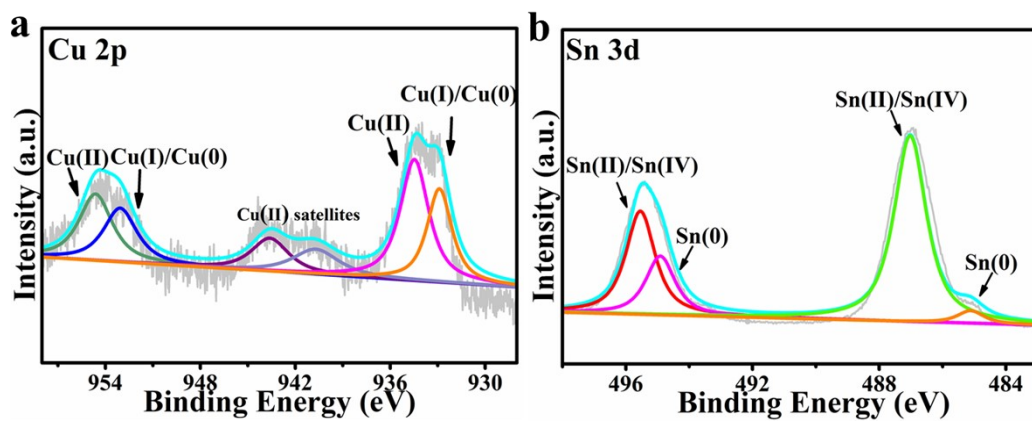

**Fig. S12.** XPS spectra of Cu-Sn alloy after stability test at  $-0.8$  V (RHE.) in (a) Cu 2p, (b) Sn 3d regions.



**Table S1.** Comparison of the NH<sub>3</sub> electrosynthesis activity for Cu-Sn alloy in 0.1 M Na<sub>2</sub>SO<sub>4</sub> (containing 0.01 M NaNO<sub>3</sub>) with other catalysts.

| Catalyst              | NH <sub>3</sub> yield rate                   | FE (%) | Ref.      |
|-----------------------|----------------------------------------------|--------|-----------|
| Cu-Sn alloy           | 293.12 $\mu\text{mol h}^{-1} \text{cm}^{-2}$ | 78.57  | This work |
| Cu/Cu <sub>2</sub> O  | 0.2449 $\text{mmol h}^{-1} \text{cm}^{-2}$   | 95.8   | 2         |
| TiO <sub>2</sub> -OVs | 0.0445 $\text{mmol h}^{-1} \text{cm}^{-2}$   | 85.0   | 3         |
| PTCDA                 | 0.030 $\text{mmol h}^{-1} \text{cm}^{-2}$    | 85.9   | 4         |

**Table S2.** The concentration of  $\text{CuSO}_4$  and  $\text{SnCl}_2$  to synthesize series of Cu-Sn alloy.

|                                                    | <b>Cu:Sn = 2:1</b> | <b>Cu:Sn = 1:1</b> | <b>Cu:Sn = 1:2</b> |
|----------------------------------------------------|--------------------|--------------------|--------------------|
| <b>Concentration of <math>\text{SnCl}_2</math></b> | 0.1 M              | 0.05 M             | 0.05 M             |
| <b>Concentration of <math>\text{CuSO}_4</math></b> | 0.05 M             | 0.05 M             | 0.1 M              |

## References

1. D. Zhu, L. Zhang, R. E. Ruther and R. J. Hamers, *Nat. Mater.*, 2013, **12**, 836–841.
2. Y. Wang, W. Zhou, R. Jia, Y. Yu and B. Zhang, *Angew. Chem. Int. Ed.*, 2020, **59**, 5350–5354.
3. R. Jia, Y. Wang, C. Wang, Y. Ling, Y. Yu and B. Zhang, *ACS Catal.*, 2020, **10**, 3533–3540.
4. Y. Wang, A. Xu, Z. Wang, L. Huang, J. Li, F. Li, J. Wicks, M. Luo, D. Nam, C. Tan, Y. Ding, J. Wu, Y. Lum, C. Dinh, D. Sinton, G. Zheng and E. H. Sargent, *J. Am. Chem. Soc.*, 2020, **142**, 5702–5708.
